# Supplementary material
Source: PubMed Central journal article supplement (PMC7085865)
Supplement: NIHMS967285-supplement-Appendix.pdf [file NIHMS967285-supplement-Appendix.pdf]

**Table A: Variable Coding**

|                                                                |               |                                                                                                                                                                                                                                                                                                                                                                                                                                                                                                                                                                                                                                                                                                                                                                                                                                                                                                                                                                                                                                                                                                                 |
|----------------------------------------------------------------|---------------|-----------------------------------------------------------------------------------------------------------------------------------------------------------------------------------------------------------------------------------------------------------------------------------------------------------------------------------------------------------------------------------------------------------------------------------------------------------------------------------------------------------------------------------------------------------------------------------------------------------------------------------------------------------------------------------------------------------------------------------------------------------------------------------------------------------------------------------------------------------------------------------------------------------------------------------------------------------------------------------------------------------------------------------------------------------------------------------------------------------------|
| <b>Children With Special Health Care Needs</b>                 | Variable name | cshcn                                                                                                                                                                                                                                                                                                                                                                                                                                                                                                                                                                                                                                                                                                                                                                                                                                                                                                                                                                                                                                                                                                           |
|                                                                | Coding        | <p>1 = Screened positive for having a special health care need using the CSHCN Screener. Requires answering “yes” to 1 of 5 items and follow up probes.<br/>0 = Screened negative with the CSHCN Screener.</p> <p>Criteria:</p> <ol style="list-style-type: none"> <li>1. Need or use of prescription medication</li> <li>2. Above routine need or use of services</li> <li>3. Functional limitations</li> <li>4. Need or use of special therapy</li> <li>5. Need or use of counseling or treatment for psychosocial issues</li> </ol> <p>The screener is based upon the federal Maternal and Child Health Bureau definition of CSHCN: “those who have or are at increased risk for a chronic physical, developmental, behavioral, or emotional condition and who also require health and related services of a type or amount beyond that required by children generally.”</p> <p>For full screener and scoring, please see:<br/><a href="http://www.cahmi.org/wp-content/uploads/2014/06/CSHCNS-Survey-and-scoring.pdf">http://www.cahmi.org/wp-content/uploads/2014/06/CSHCNS-Survey-and-scoring.pdf</a></p> |
| <b>Household Generational Status</b>                           | Variable name | HOUSE_GEN                                                                                                                                                                                                                                                                                                                                                                                                                                                                                                                                                                                                                                                                                                                                                                                                                                                                                                                                                                                                                                                                                                       |
|                                                                | Coding        | <p>1 = Child and all parents born abroad<br/>2 = Child born in the US and at least 1 parent born abroad; Child born abroad and 1 parent born in the US<br/>3 = Both parents born in US and child born in US or abroad</p>                                                                                                                                                                                                                                                                                                                                                                                                                                                                                                                                                                                                                                                                                                                                                                                                                                                                                       |
| <b>Number of Currently Diagnosed Chronic Health Conditions</b> | Variable name | ind1_9a_11                                                                                                                                                                                                                                                                                                                                                                                                                                                                                                                                                                                                                                                                                                                                                                                                                                                                                                                                                                                                                                                                                                      |
|                                                                | Coding        | <p>0 = Parent/guardian reports child is currently diagnosed with none of a list of 18 common chronic conditions<br/>1 = Parent/guardian reports child is currently diagnosed with 1 of 18 common chronic conditions</p>                                                                                                                                                                                                                                                                                                                                                                                                                                                                                                                                                                                                                                                                                                                                                                                                                                                                                         |

|                                 |               |                                                                                                                                                                                                                                                                                                                                                                                                                                                                                                                                                                                                                                                                                                                                                                                                                                  |
|---------------------------------|---------------|----------------------------------------------------------------------------------------------------------------------------------------------------------------------------------------------------------------------------------------------------------------------------------------------------------------------------------------------------------------------------------------------------------------------------------------------------------------------------------------------------------------------------------------------------------------------------------------------------------------------------------------------------------------------------------------------------------------------------------------------------------------------------------------------------------------------------------|
|                                 |               | <p>2 = Parent/guardian reports child is currently diagnosed with 2 or more of 18 common chronic conditions</p> <p>Chronic conditions screened for:</p> <ol style="list-style-type: none"> <li>1. Learning disabilities</li> <li>2. ADD/ADHD</li> <li>3. Depression</li> <li>4. Anxiety problems</li> <li>5. ODD or conduct disorder</li> <li>6. Autism</li> <li>7. Developmental delay</li> <li>8. Intellectual disability or mental retardation</li> <li>9. Cerebral palsy</li> <li>10. Speech problems</li> <li>11. Tourette syndrome</li> <li>12. Asthma</li> <li>13. Diabetes</li> <li>14. Epilepsy or seizure disorder</li> <li>15. Hearing problems</li> <li>16. Vision problems not corrected with glasses/contact lenses</li> <li>17. Bone, joint, or muscle problems</li> <li>18. Brain injury or concussion</li> </ol> |
| <b>Sex of Child</b>             | Variable name | sex_11                                                                                                                                                                                                                                                                                                                                                                                                                                                                                                                                                                                                                                                                                                                                                                                                                           |
|                                 | Coding        | 1 = Male<br>2 = Female                                                                                                                                                                                                                                                                                                                                                                                                                                                                                                                                                                                                                                                                                                                                                                                                           |
| <b>Age of Child</b>             | Variable name | age3_11                                                                                                                                                                                                                                                                                                                                                                                                                                                                                                                                                                                                                                                                                                                                                                                                                          |
|                                 | Coding        | 1 = 0-5 years old<br>2 = 6-11 years old<br>3 = 12-17 years old                                                                                                                                                                                                                                                                                                                                                                                                                                                                                                                                                                                                                                                                                                                                                                   |
| <b>Child's Race/Ethnicity</b>   | Variable name | race4_11                                                                                                                                                                                                                                                                                                                                                                                                                                                                                                                                                                                                                                                                                                                                                                                                                         |
|                                 | Coding        | 1 = Ethnically Hispanic/Latino, any race<br>2 = White, non-Hispanic/Latino<br>3 = Black, non-Hispanic/Latino<br>4 = Multi-racial/Other, non-Hispanic/Latino                                                                                                                                                                                                                                                                                                                                                                                                                                                                                                                                                                                                                                                                      |
| <b>Child's Insurance Status</b> | Variable name | ind3_1_11                                                                                                                                                                                                                                                                                                                                                                                                                                                                                                                                                                                                                                                                                                                                                                                                                        |
|                                 | Coding        | 0 = Child has no health coverage (insurance, prepaid plans, or government plans)<br>1 = Child has health coverage (insurance, prepaid plans, or government plan)                                                                                                                                                                                                                                                                                                                                                                                                                                                                                                                                                                                                                                                                 |
|                                 | Variable name | planguage                                                                                                                                                                                                                                                                                                                                                                                                                                                                                                                                                                                                                                                                                                                                                                                                                        |

|                                               |                |                                                                                                                                                                                                                  |
|-----------------------------------------------|----------------|------------------------------------------------------------------------------------------------------------------------------------------------------------------------------------------------------------------|
| <b>Primary Household Language</b>             | Coding         | 1 = English is primary language spoken in respondent's home<br>2 = Language other than English is primarily spoken in respondent's home                                                                          |
| <b>Highest Education in Child's Household</b> | Variable names | EDUC_MOMR, EDUC_DADR, EDUC_RESR                                                                                                                                                                                  |
|                                               | Coding         | Highest educational level attained by an adult guardian (mother, father, or respondent) in the child's household.<br><br>1 = Less than high school<br>2 = High school graduate<br>3 = Post-high school education |

All variables provided by Data Resource Center and/or Child and Adolescent Health Measurement Initiative.

CSHCN = Children with Special Health Care Needs      ADD = Attention Deficit Disorder  
ADHD = Attention Deficit Hyperactivity Disorder      ODD = Oppositional Defiant Disorder

**Table B: Crude and Adjusted Odds Ratios for Identification of a Child with Special Health Care Needs using the CSHCN-S**

|                                               | Sample N = 89,380<br>F (14, 89265) = 348.91 |                          |
|-----------------------------------------------|---------------------------------------------|--------------------------|
|                                               | OR (95% CI)                                 | AOR (95% CI)             |
| <i>Constant</i>                               |                                             | 0.06 (0.05 – 0.07)       |
| <i>Household Generational Status</i>          |                                             |                          |
| First                                         | 0.29 (0.19 – 0.44)***                       | 0.58 (0.37 – 0.91)‡      |
| Second                                        | 0.46 (0.41 – 0.51)***                       | 0.81 (0.66 – 0.98)‡      |
| Third                                         | 1.00                                        | 1.00                     |
| <i>Number of Chronic Conditions</i>           |                                             |                          |
| None                                          | 1.00                                        | 1.00                     |
| One                                           | 18.86 (16.94 – 20.99)***                    | 17.63 (15.80 – 19.67)*** |
| Two or more                                   | 90.54 (78.14 – 104.91)***                   | 84.76 (72.76 – 98.73)*** |
| <i>Sex of child</i>                           |                                             |                          |
| Female                                        | 1.00                                        | 1.00                     |
| Male                                          | 1.42 (1.32 – 1.53)***                       | 1.07 (0.97 – 1.18)       |
| <i>Age of child (years)</i>                   |                                             |                          |
| 0 – 5                                         | 1.00                                        | 1.00                     |
| 6 – 11                                        | 2.33 (2.11 – 2.58)***                       | 1.32 (1.17 – 1.49)***    |
| 12 – 17                                       | 2.65 (2.41 – 2.92)***                       | 1.32 (1.16 – 1.50)***    |
| <i>Child's Race/Ethnicity</i>                 |                                             |                          |
| White, non-Latino                             | 1.00                                        | 1.00                     |
| Black, non-Latino                             | 1.14 (1.02 – 1.26)‡                         | 1.00 (0.87 – 1.16)       |
| Multi-racial/Other, non-Latino                | 0.78 (0.70 – 0.88)***                       | 0.96 (0.81 – 1.13)       |
| Latino                                        | 0.63 (0.55 – 0.71)***                       | 1.05 (0.86 – 1.28)       |
| <i>Child's Insurance Status</i>               |                                             |                          |
| Uninsured                                     | 1.00                                        | 1.00                     |
| Insured                                       | 1.90 (1.53 – 2.36)***                       | 1.41 (1.08 – 1.85)‡      |
| <i>Primary Household Language</i>             |                                             |                          |
| English                                       | 1.00                                        | 1.00                     |
| Spanish or other                              | 0.35 (0.30 – 0.42)***                       | 0.66 (0.49 – 0.88)***    |
| <i>Highest education in child's household</i> |                                             |                          |
| Less than high school                         | 0.68 (0.58 – 0.79)***                       | 0.67 (0.53 – 0.84)***    |

|                                       |                    |                       |
|---------------------------------------|--------------------|-----------------------|
| High school graduate or GED completed | 0.98 (0.89 – 1.08) | 0.80 (0.70 – 0.91)*** |
| Post-high school education            | 1.00               | 1.00                  |

‡ p < 0.05    \*\* p < 0.01    \*\*\* p < 0.001

CSHCN-S = Children with Special Health Care Needs Screener    COR = Crude Odds Ratio

AOR = Adjusted Odds Ratio    CI = Confidence Interval

**Table C. Crude and Adjusted\* Odds Ratios for Identification of a Child with Special Health Care Needs by CSHCN-S Criteria and Household Generational Status (n = 89, 380)**

| <b>Need or Use of a Prescription Medication</b>                       |                       |                       |
|-----------------------------------------------------------------------|-----------------------|-----------------------|
|                                                                       | COR (95% CI)          | AOR (95% CI)          |
| 1 <sup>st</sup> Generation                                            | 0.12 (0.09 – 0.18)*** | 0.27 (0.17 – 0.45)*** |
| 2 <sup>nd</sup> Generation                                            | 0.42 (0.37 – 0.48)*** | 0.81 (0.55 – 1.00)‡   |
| 3 <sup>rd</sup> Generation                                            | 1.00                  | 1.00                  |
| <b>Above Routine Use of Services</b>                                  |                       |                       |
|                                                                       | COR (95% CI)          | AOR (95% CI)          |
| 1 <sup>st</sup> Generation                                            | 0.25 (0.11 – 0.54)*** | 0.66 (0.32 – 1.36)    |
| 2 <sup>nd</sup> Generation                                            | 0.47 (0.39 – 0.55)*** | 0.99 (0.76 – 1.29)    |
| 3 <sup>rd</sup> Generation                                            | 1.00                  | 1.00                  |
| <b>Functional Limitation</b>                                          |                       |                       |
|                                                                       | COR (95% CI)          | AOR (95% CI)          |
| 1 <sup>st</sup> Generation                                            | 0.38 (0.15 – 1.06)    | 1.14 (0.44 – 2.96)    |
| 2 <sup>nd</sup> Generation                                            | 0.58 (0.45 – 0.74)*** | 1.17 (0.86 – 1.58)    |
| 3 <sup>rd</sup> Generation                                            | 1.00                  | 1.00                  |
| <b>Need or Use of Special Therapy</b>                                 |                       |                       |
|                                                                       | COR (95% CI)          | AOR (95% CI)          |
| 1 <sup>st</sup> Generation                                            | 0.59 (0.24 – 1.46)    | 1.68 (0.77 – 3.65)    |
| 2 <sup>nd</sup> Generation                                            | 0.61 (0.49 – 0.76)*** | 1.09 (0.82 – 1.44)    |
| 3 <sup>rd</sup> Generation                                            | 1.00                  | 1.00                  |
| <b>Need or Use of Counseling or Treatment for Psychosocial Issues</b> |                       |                       |
|                                                                       | COR (95% CI)          | AOR (95% CI)          |
| 1 <sup>st</sup> Generation                                            | 0.59 (0.32 – 1.10)    | 1.66 (0.83 – 3.30)    |
| 2 <sup>nd</sup> Generation                                            | 0.44 (0.37 – 0.54) ‡  | 0.87 (0.67 – 1.15)    |
| 3 <sup>rd</sup> Generation                                            | 1.00                  | 1.00                  |

\*Adjusted for child's number of currently diagnosed chronic conditions, sex, age, race/ethnicity, and insurance status and household language and educational attainment.

‡ p < 0.05    \*\* p < 0.01    \*\*\* p < 0.001

CSHCN-S = Children with Special Health Care Needs Screener    COR = Crude Odds Ratio  
AOR = Adjusted Odds Ratio

**Table D. Prevalence of 18 Common Chronic Conditions among Children from 1<sup>st</sup>, 2<sup>nd</sup>, and 3<sup>rd</sup> Generation Households<sup>a</sup>**

|                                                                         | <b>1<sup>st</sup> generation</b> | <b>2<sup>nd</sup> generation</b> | <b>3<sup>rd</sup> generation</b> |
|-------------------------------------------------------------------------|----------------------------------|----------------------------------|----------------------------------|
| <b>Learning Disability<br/>(age 3-17)</b>                               | 4.4 (2.6 – 7.5)                  | 4.9 (4.2 – 5.8)                  | 8.9 (8.4 – 9.4)                  |
| <b>ADD/ADHD<br/>(age 2-17)</b>                                          | 1.8 (0.6 – 5.6)                  | 3.1 (2.6 – 3.7)                  | 9.4 (8.9 – 10.0)                 |
| <b>Depression<br/>(age 2-17)</b>                                        | 2.3 (0.9 – 6.0)                  | 0.7 (0.5 – 1.1)                  | 2.4 (2.2 – 2.7)                  |
| <b>Anxiety Problems<br/>(age 2-17)</b>                                  | 1.1 (0.4 – 2.8)                  | 1.5 (1.2 – 1.9)                  | 4.0 (3.7 – 4.3)                  |
| <b>ODD or Conduct Disorder<br/>(age 2-17)</b>                           | 1.9 (0.6 – 5.5)                  | 1.5 (1.0 – 2.0)                  | 3.6 (3.2 – 3.9)                  |
| <b>Autism<br/>(age 2-17)</b>                                            | 1.9 (0.6 – 6.2)                  | 1.1 (0.8 – 1.4)                  | 2.1 (1.8 – 2.3)                  |
| <b>Developmental Delay<br/>(age 2-17)</b>                               | 0.5 (0.2 – 1.2)                  | 2.2 (1.8 – 2.8)                  | 4.1 (3.7 – 4.4)                  |
| <b>Intellectual Disability or<br/>Mental Retardation<br/>(age 2-17)</b> | 0.7 (0.1 – 3.6)                  | 0.8 (0.5 – 1.2)                  | 1.1 (0.9 – 1.3)                  |
| <b>Cerebral Palsy<br/>(age 2-17)</b>                                    | 0.0 (0.0 – 0.2)                  | 0.2 (0.0 – 0.3)                  | 0.2 (0.2 – 0.3)                  |
| <b>Speech Problems<br/>(age 2-17)</b>                                   | 2.8 (1.2 – 6.4)                  | 4.0 (3.3 – 4.8)                  | 5.1 (4.8 – 5.5)                  |
| <b>Tourette Syndrome<br/>(age 0-17)</b>                                 | 0.0 (0.0 – 0.0)                  | 0.1 (0.0 – 0.2)                  | 0.2 (0.1 – 0.2)                  |
| <b>Asthma<br/>(age 0-17)</b>                                            | 2.5 (1.6 – 3.9)                  | 5.5 (4.8 – 6.4)                  | 9.8 (9.3 – 10.3)                 |
| <b>Diabetes<br/>(age 0-17)</b>                                          | 0.3 (0.0 – 0.9)                  | 0.1 (0.0 – 0.3)                  | 0.4 (0.3 – 0.5)                  |



|                                                                             |                 |                 |                 |
|-----------------------------------------------------------------------------|-----------------|-----------------|-----------------|
| <b>Epilepsy or Seizure Disorder<br/>(age 0-17)</b>                          | 0.0 (0.0 – 0.0) | 0.4 (0.2 – 0.7) | 0.7 (0.6 – 0.9) |
| <b>Hearing Problems<br/>(age 0-17)</b>                                      | 1.0 (0.3 – 3.3) | 0.5 (0.4 – 0.8) | 1.5 (1.3 – 1.7) |
| <b>Vision Problems Not Corrected<br/>by Glasses/Contacts<br/>(age 0-17)</b> | 1.0 (0.5 – 2.0) | 1.4 (1.0 – 2.0) | 1.3 (1.1 – 1.4) |
| <b>Bone, Joint, or Muscle<br/>Problems (age 0-17)</b>                       | 1.1 (0.5 – 2.2) | 1.7 (1.2 – 2.3) | 2.5 (2.2 – 2.7) |
| <b>Brain Injury or Concussion<br/>(age 0-17)</b>                            | 0.0 (0.0 – 0.0) | 0.2 (0.1 – 0.3) | 0.3 (0.2 – 0.4) |

<sup>a</sup>Weighted percentiles and 95% confidence intervals are shown for each cell.

ADD = Attention Deficit Disorder    ADHD = Attention Deficit Hyperactivity Disorder  
 ODD = Oppositional Defiant Disorder

**Table E. Prevalence of 18 Common Chronic Conditions among Children with at least 1 Diagnosed Chronic Condition from 1<sup>st</sup>, 2<sup>nd</sup>, and 3<sup>rd</sup> Generation Households<sup>a</sup>**

|                                                                         | <b>1<sup>st</sup> generation</b> | <b>2<sup>nd</sup> generation</b> | <b>3<sup>rd</sup> generation</b> |
|-------------------------------------------------------------------------|----------------------------------|----------------------------------|----------------------------------|
| <b>Learning Disability<br/>(age 3-17)</b>                               | 38.1 (24.6 – 53.7)               | 27.3 (23.5 – 31.5)               | 30.0 (28.5 – 31.5)               |
| <b>ADD/ADHD<br/>(age 2-17)</b>                                          | 16.1 (5.7 – 38.4)                | 17.9 (14.9 – 21.4)               | 32.7 (31.2 – 34.3)               |
| <b>Depression<br/>(age 2-17)</b>                                        | 20.0 (8.3 – 40.9)                | 4.2 (2.8 – 6.4)                  | 8.4 (7.5 – 9.4)                  |
| <b>Anxiety Problems<br/>(age 2-17)</b>                                  | 9.5 (3.8 – 21.9)                 | 8.4 (6.6 – 10.7)                 | 13.7 (12.7 – 14.8)               |
| <b>ODD or Conduct Disorder<br/>(age 2-17)</b>                           | 16.3 (5.9 – 37.7)                | 8.5 (6.1 – 11.6)                 | 12.3 (11.3 – 13.5)               |
| <b>Autism<br/>(age 2-17)</b>                                            | 16.3 (5.2 – 40.7)                | 6.4 (4.9 – 8.4)                  | 7.2 (6.4 – 8.0)                  |
| <b>Developmental Delay<br/>(age 2-17)</b>                               | 4.4 (1.9 – 10.1)                 | 13.0 (10.4 – 16.2)               | 14.0 (13.0 – 15.2)               |
| <b>Intellectual Disability or<br/>Mental Retardation<br/>(age 2-17)</b> | 6.0 (1.1 – 25.8)                 | 4.5 (2.9 – 6.9)                  | 3.9 (3.3 – 4.5)                  |
| <b>Cerebral Palsy<br/>(age 2-17)</b>                                    | 0.5 (0.1 – 1.9)                  | 1.0 (0.5 – 1.8)                  | 0.8 (0.6 – 1.0)                  |
| <b>Speech Problems<br/>(age 2-17)</b>                                   | 24.0 (11.5 – 43.6)               | 23.1 (19.3 – 27.3)               | 17.7 (16.5 – 18.9)               |
| <b>Tourette Syndrome<br/>(age 0-17)</b>                                 | 0.2 (0.0 – 0.7)                  | 0.6 (0.3 – 1.2)                  | 0.6 (0.5 – 0.8)                  |
| <b>Asthma<br/>(age 0-17)</b>                                            | 21.5 (13.6 – 32.4)               | 36.3 (32.0 – 40.9)               | 37.2 (35.7 – 38.7)               |
| <b>Diabetes<br/>(age 0-17)</b>                                          | 2.0 (0.5 – 7.9)                  | 0.9 (0.5 – 1.7)                  | 1.4 (1.0 – 1.7)                  |

|                                                                     |                  |                   |                  |
|---------------------------------------------------------------------|------------------|-------------------|------------------|
| <b>Epilepsy or Seizure Disorder (age 0-17)</b>                      | 0.2 (0.0 – 0.7)  | 2.4 (1.3 – 4.5)   | 2.9 (2.4 – 3.4)  |
| <b>Hearing Problems (age 0-17)</b>                                  | 8.3 (2.4 – 24.9) | 3.5 (2.5 – 5.0)   | 5.5 (4.9 – 6.3)  |
| <b>Vision Problems Not Corrected by Glasses/Contacts (age 0-17)</b> | 8.9 (4.3 – 17.4) | 9.2 (6.6 – 12.6)  | 4.8 (4.2 – 5.5)  |
| <b>Bone, Joint, or Muscle Problems (age 0-17)</b>                   | 9.3 (4.4 – 18.4) | 11.2 (8.2 – 15.0) | 9.3 (8.5 – 10.2) |
| <b>Brain Injury or Concussion (age 0-17)</b>                        | 0.2 (0.0 – 0.6)  | 1.2 (0.7 – 2.0)   | 1.1 (0.9 – 1.4)  |

<sup>a</sup>Weighted percentiles and 95% confidence intervals are shown for each cell.

ADD = Attention Deficit Disorder    ADHD = Attention Deficit Hyperactivity Disorder

ODD = Oppositional Defiant Disorder
